# Supplementary material for: A gadolinium(iii) complex based dual-modal probe for MRI and fluorescence sensing of fluoride ions in aqueous medium and in vivo
Source: Royal Society of Chemistry journal article supplement (doi:10.1039/c6dt02229d), 2016-01-01
Supplement: c6dt02229d1.pdf [file c6dt02229d1.pdf]

Electronic Supplementary Material (ESI) for Dalton Transactions

This journal is © The Royal Society of Chemistry 2015

## **Gadolinium(III) Complex based Dual-Modal Probe for MRI and Fluorescence Sensing Fluoride ion in Aqueous Medium and *in Vivo***

Yue Wang,<sup>a</sup> Renfeng Song,<sup>b</sup> Ke Guo,<sup>b</sup> Qingtao Meng,<sup>a\*</sup> Run Zhang,<sup>a,c</sup> Xiangfeng Kong<sup>a</sup> and Zhiqiang Zhang<sup>a\*</sup>

<sup>a</sup> School of Chemical Engineering, University of Science and Technology Liaoning, Anshan 114051, P. R. China

E-mail: [qtmeng@ustl.edu.cn](mailto:qtmeng@ustl.edu.cn); [zhangzhiqiang@ustl.edu.cn](mailto:zhangzhiqiang@ustl.edu.cn). Tel: +86-421-5928009

<sup>b</sup> Ansteel Mining Engineering Corporation, 27 Lvhua Street, Anshan, 114002, P. R. China, 27 Lvhua Street, Anshan, 114002, P. R. China

<sup>c</sup> Australian Institute for Bioengineering and Nanotechnology, The University of Queensland, Brisbane, 4072, Australia



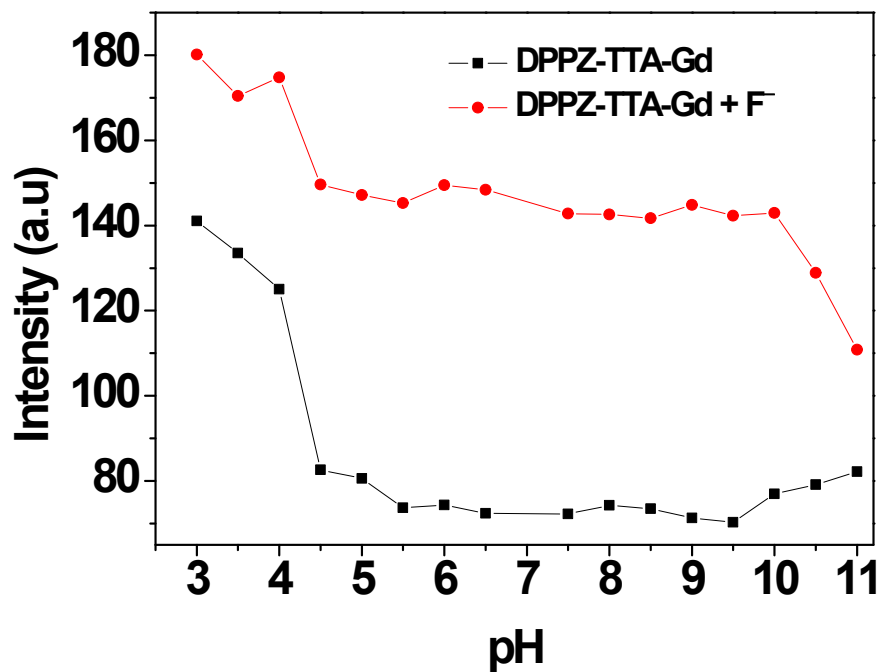

**Fig. S3** Variations of fluorescence intensity of Gd(TTA)<sub>3</sub>-DPPZ (10 μM) at 420 nm in aqueous solution in the presence and absence of fluoride ion (0.7 mM) as a function of pH. Eexcitation at 340 nm.

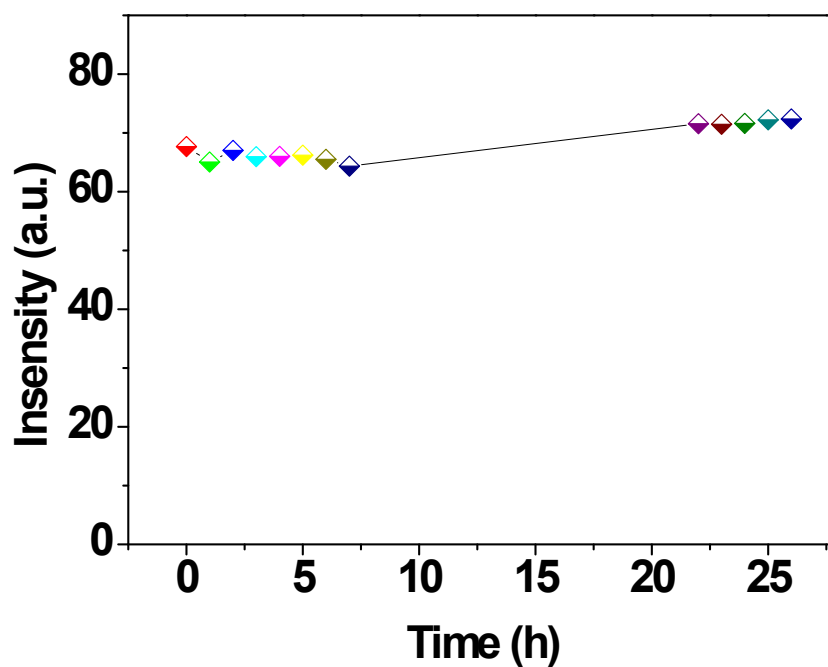

**Fig. S4** Fluorescence spectra of Gd(TTA)<sub>3</sub>-DPPZ (10 μM) at different time in H<sub>2</sub>O (THF: H<sub>2</sub>O = 5:5, pH = 7.4). The intensities were recorded at 420 nm, excitation at 340 nm.

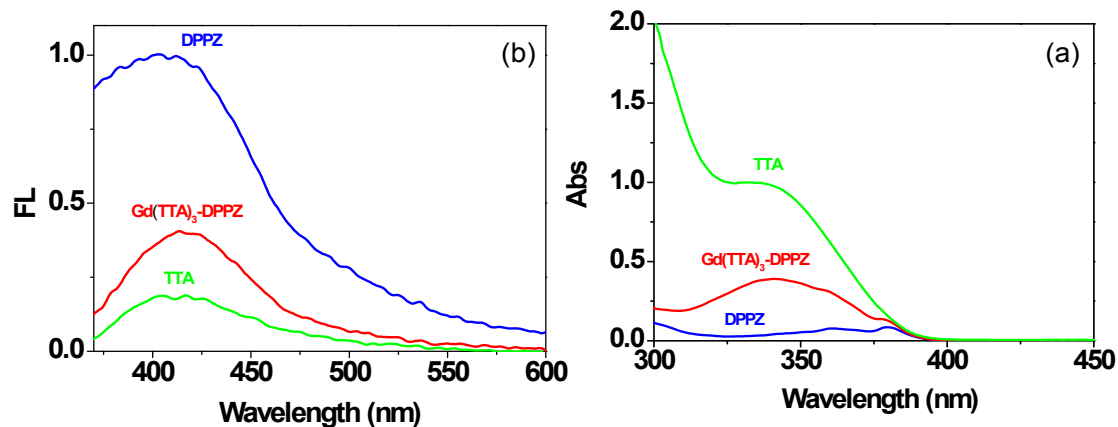

**Fig. S5** Normalized fluorescence emission and UV-Vis absorption spectra of TTA, DPPZ, and  $\text{Gd}(\text{TTA})_3\text{-DPPZ}$  (10  $\mu\text{M}$ ) in  $\text{H}_2\text{O}$  (THF:  $\text{H}_2\text{O}$  = 5:5, pH = 7.4).

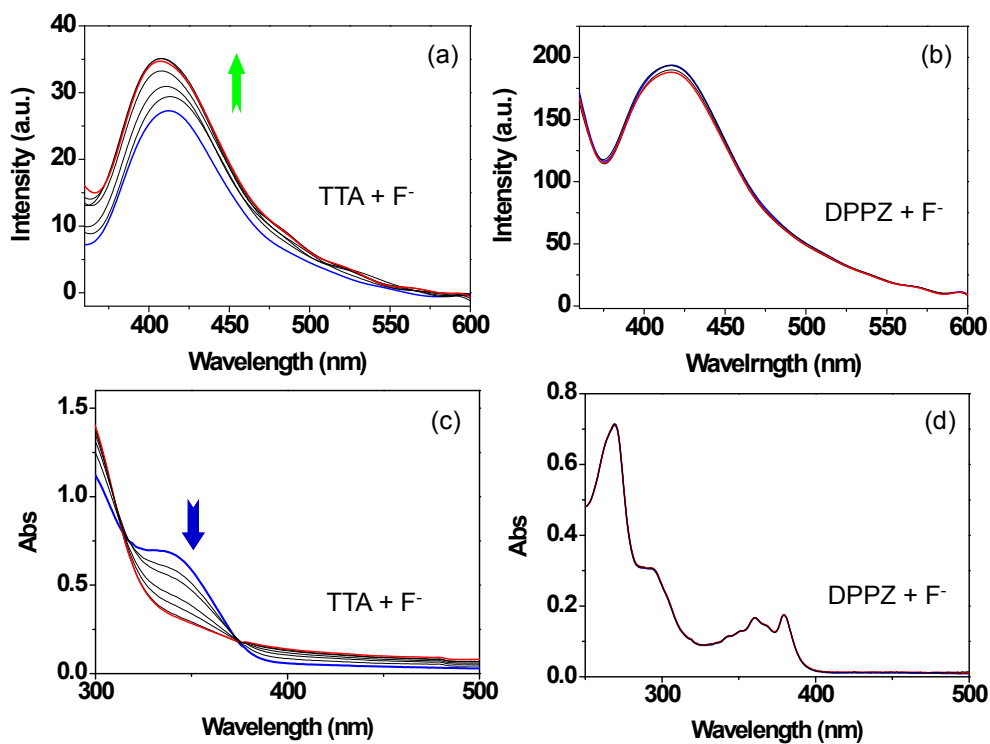

**Fig. S6** Changes in fluorescence (a), (b), and absorption (c), (d) spectra of TTA and DPPZ in the presence of increased concentrations of fluoride in  $\text{H}_2\text{O}$  (THF:  $\text{H}_2\text{O}$  = 5:5, pH = 7.4).

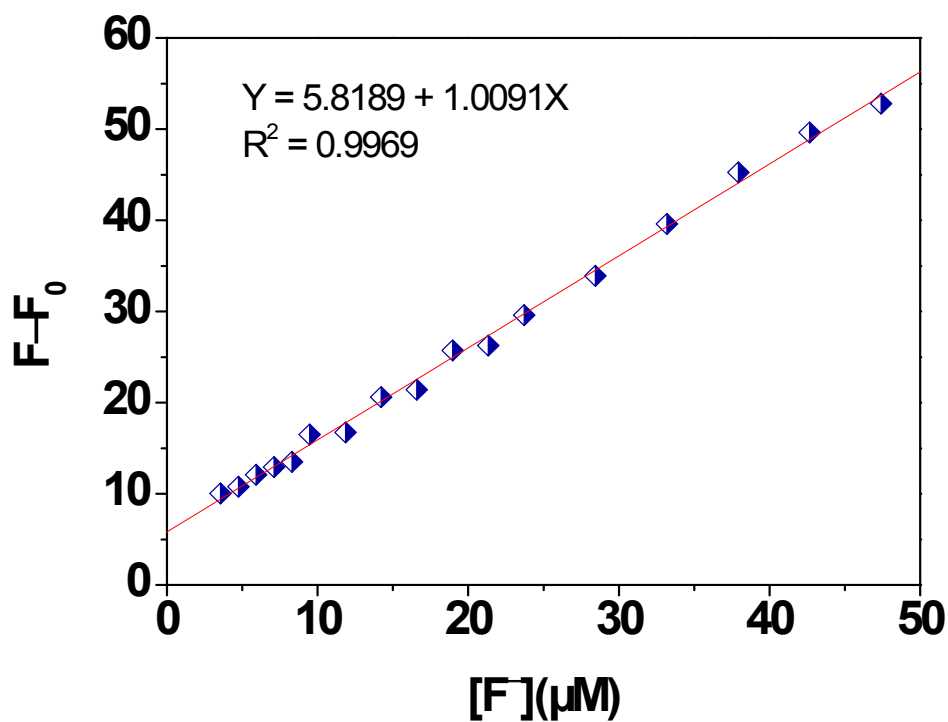

**Fig. S7** The linear fluorescence responses of Gd(TTA)<sub>3</sub>-DPPZ (2 μM) in H<sub>2</sub>O (THF: H<sub>2</sub>O = 5:5, pH = 7.4) versus low concentration fluoride concentration (0–50 μM) at 420 nm. Excitation was performed at 340 nm.

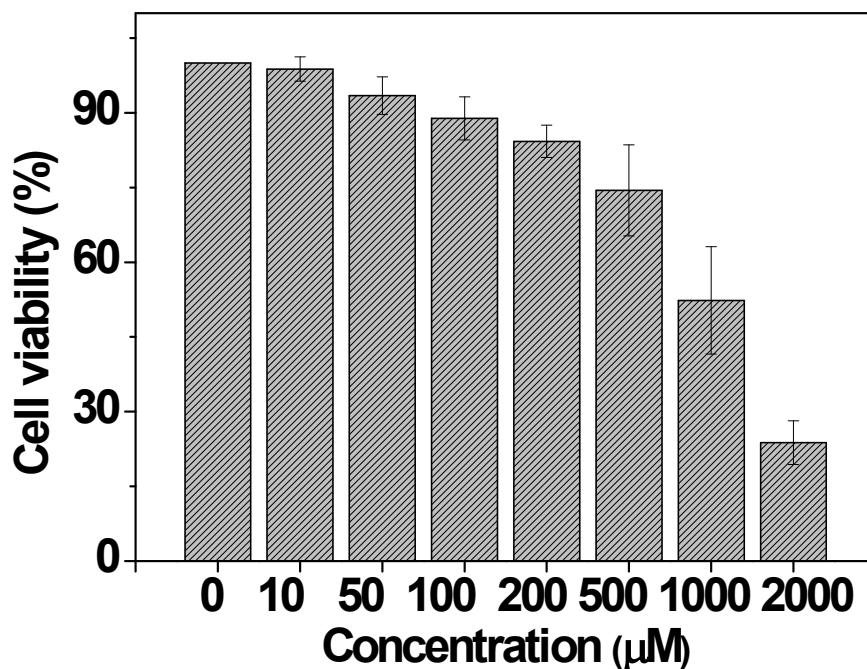

**Fig. S8** MDA-MB-231 cell viability values (%) assessed using an MTT proliferation test versus incubation concentrations of Gd(TTA)<sub>3</sub>-DPPZ.

**MTT cell viability assays.** MTT assay was utilized to investigate the cytotoxicity of Gd(TTA)<sub>3</sub>-DPPZ. MDA-MB-231 cells were seeded at a density of  $5 \times 10^4$  cells/mL in a 96-well micro-assay culture plate and growth 24 h at 37 °C in a 5% CO<sub>2</sub> incubator. Gd(TTA)<sub>3</sub>-DPPZ in fresh culture medium was added into each well with different concentrations from 10 to 2000 μM. Control wells were prepared by the addition of culture medium, and wells containing culture media without cells were used as blanks. After incubation at 37 °C in a 5% CO<sub>2</sub> incubator for 6 h, cell culture medium was removed and cells were washed three times with PBS. Then, 100 μL, 0.5 mg/mL MTT solution in PBS was added to each well, and the cells were incubated for another 4 h. The excess MTT solution was then carefully removed from each well, and the formed formazan was dissolved in 100 μL of DMSO (dimethyl sulfoxide). The optical density of each well was then measured at a wavelength of 540 nm using a microplate reader (Bio-Rad, xMark). The results from the five individual experiments were averaged. The following formula was used to calculate the viability of cell growth:

Viability (%) = (mean of absorbance value of treatment group–blank)/(mean absorbance value of control–blank) × 100.

**Table S1.** Comparisons of the sensitivity of Gd(TTA)<sub>3</sub>-DPPZ with other reported fluoride ion fluorescence probes

| Sensing mechanisms             | No.        | Probe Name                                            | Solution                                       | Fluorescence sensitivity |
|--------------------------------|------------|-------------------------------------------------------|------------------------------------------------|--------------------------|
| Hydrogen bonding               | Refer. 1   | Sensor 1                                              | CH <sub>3</sub> CN :<br>HEPES (0.02 M, pH 7.2) | 1.21 μM                  |
|                                | Refer. 2   | R1                                                    | DMF                                            | 0.4 μM                   |
|                                | Refer. 3   | probe 1                                               | DMSO                                           | 1.8 μM                   |
|                                | Refer. 4   | 1-Naphthaldoxime 1                                    | DMSO/Water (99/1)                              | 50 ppb                   |
|                                | Refer. 5   | S2                                                    | DMSO                                           | 10 ppm                   |
|                                | Refer. 6   | [Eu.L <sub>1</sub> ] <sup>+</sup>                     | HEPES (pH 7.4)                                 | 0.2 μM                   |
| Fluoroborate complexation      | Refer. 7   | BAPTA-Ca                                              | MOPS buffer (pH 7.0).                          | 0.3 mM                   |
|                                | Refer. 8   | [Zr(H <sub>2</sub> O) <sub>2</sub> edta]–<br>flavonol | Acetate buffer (pH 5.0);                       | 3 μM (60 ppb)            |
|                                | Refer. 9   | RF                                                    | Ethanol/Water (2/3)                            | 1.6 μM                   |
| Fluoride mediated desilylation | Refer. 10  | Sensor 1                                              | CH <sub>3</sub> CN                             | 1.0 μM                   |
|                                | Refer. 11  | Probe FP                                              | CH <sub>3</sub> CN                             | 19 ppb                   |
|                                | Refer. 12  | BW-F-204                                              | PBS (pH 7.4)                                   | 18 μM                    |
|                                | Refer. 13  | QF                                                    | PBS (pH 7.4)                                   | 0.5 μM                   |
|                                | Refer. 14  | FP-1                                                  | HEPES-CH <sub>3</sub> CN (1:5, pH 7.4)         | 0.59 μM                  |
|                                | This paper | Gd(TTA) <sub>3</sub> -DPPZ                            | THF: H <sub>2</sub> O (5:5, pH = 7.4)          | <b>70 nM (1.33 ppb)</b>  |

#### References:

1. A. K. Mahapatra, R. Maji, K. Maiti, S. S. Adhikari, C. D. Mukhopadhyay and D. Mandal, *Analyst*, 2014, **139**, 309–317.
2. C. Parthiban and K. P. Elango, *Sensors and Actuators B*, 2015, **215**, 544–552.
3. M. Yu, J. Xu, C. Peng, Z. Li, C. Liu and L. Wei, *Tetrahedron*, 2016, **72**, 273–278.
4. C. B. Rosen, D. J. Hansen and K. V. Gothelf, *Org. Biomol. Chem.*, 2013, **11**, 7916–7922.
5. M. S. Kumar, S. L. A. Kumar and A. Sreekanth, *Anal. Methods*, 2013, **5**, 6401–6410.
6. S. J. Butler, *Chem. Commun.*, 2015, **51**, 10879–10882.

7. S. Rochat and Kay Severin, *Chem. Commun.*, 2011, **47**, 4391–4393.
8. Y. Takahashi, D. A. P. Tanaka, H. Matsunaga and T. M. Suzuki, *J. Chem. Soc., Perkin Trans.*, 2002, **2**, 759–762.
9. Y. Mia, Z. Caob, Y. Chen, S. Long, Q. Xie, D. Liang, W. Zhu and J. Xiang, *Sensors and Actuators B*, 2014, **192**, 164– 172
10. Y. Bao, B. Liu, F. Du, J. Tian, H. Wang and R. Bai, *J. Mater. Chem.*, 2012, **22**, 5291–5294.
11. S. Zhang, J. Fan, S. Zhang, J. Wang, X. Wang, J. Du and X. Peng, *Chem. Commun.*, 2014, **50**, 14021–14024.
12. Y. Zheng, Y. Duan, K. Ji, R.-L. Wang and B. Wang, *RSC Adv.*, 2016, **6**, 25242–25245.
13. W. Hu, L. Zeng, Y. Wang, Z. Liu, X. Ye and C. Li, *Analyst*, 2016, DOI: 10.1039/C6AN00905K.
14. M. Yoo, S. Park and H.-J. Kim, *RSC Adv.*, 2016, **6**, 19910–19915.
